# Supplementary material for: Human genomic DNA is widely interspersed with i-motif structures
Source: PubMed Central journal article supplement (PMC11480443; doi:10.1038/s44318-024-00210-5), 2024-08-29
Supplement: 44318_2024_210_MOESM4_ESM.pdf [file 44318_2024_210_MOESM4_ESM.pdf]

## Expanded View Figures

**Figure EV1. iM immunoprecipitation (controls, repeats).**

(A) Regions observed across replicate experiments, intersected iM regions observed after immunoprecipitation of protein-depleted purified DNA from the MCF7 cell-line protein-depleted DNA. Immunoprecipitation experimental repeats using an incubation temperature of 16 °C or 4 °C. (B) Regions observed across experiment repeats in DNA from two different cell-lines. Replicates for HEK293T and U2OS protein-depleted DNA from pulldowns conducted at 4 °C. (C) Pairwise intersection-fraction of overlap pie charts of all-vs-all experiments conducted. (D) Genomic view highlighting an iM structure upstream of the oncogenes *ATM*, *SIRPA*, and *TSHR*. iM regions from each cell line replicates are shown (green tracks: MCF7, brown tracks: MCF7 DNA incubated at 16 °C, purple tracks: HEK293T, blue tracks: U2OS, lower tracks: immunoprecipitation negative control input profiles). (E) hTelo positive control CD curve under variable pH conditions (left panel) and validation of an identified iM candidate upstream of *SIRPA* and *TSHR* by DNA synthesis following CD spectroscopy under variable pH (pH 5-8) and a temperature of 25 °C. CD Circular Dichroism.

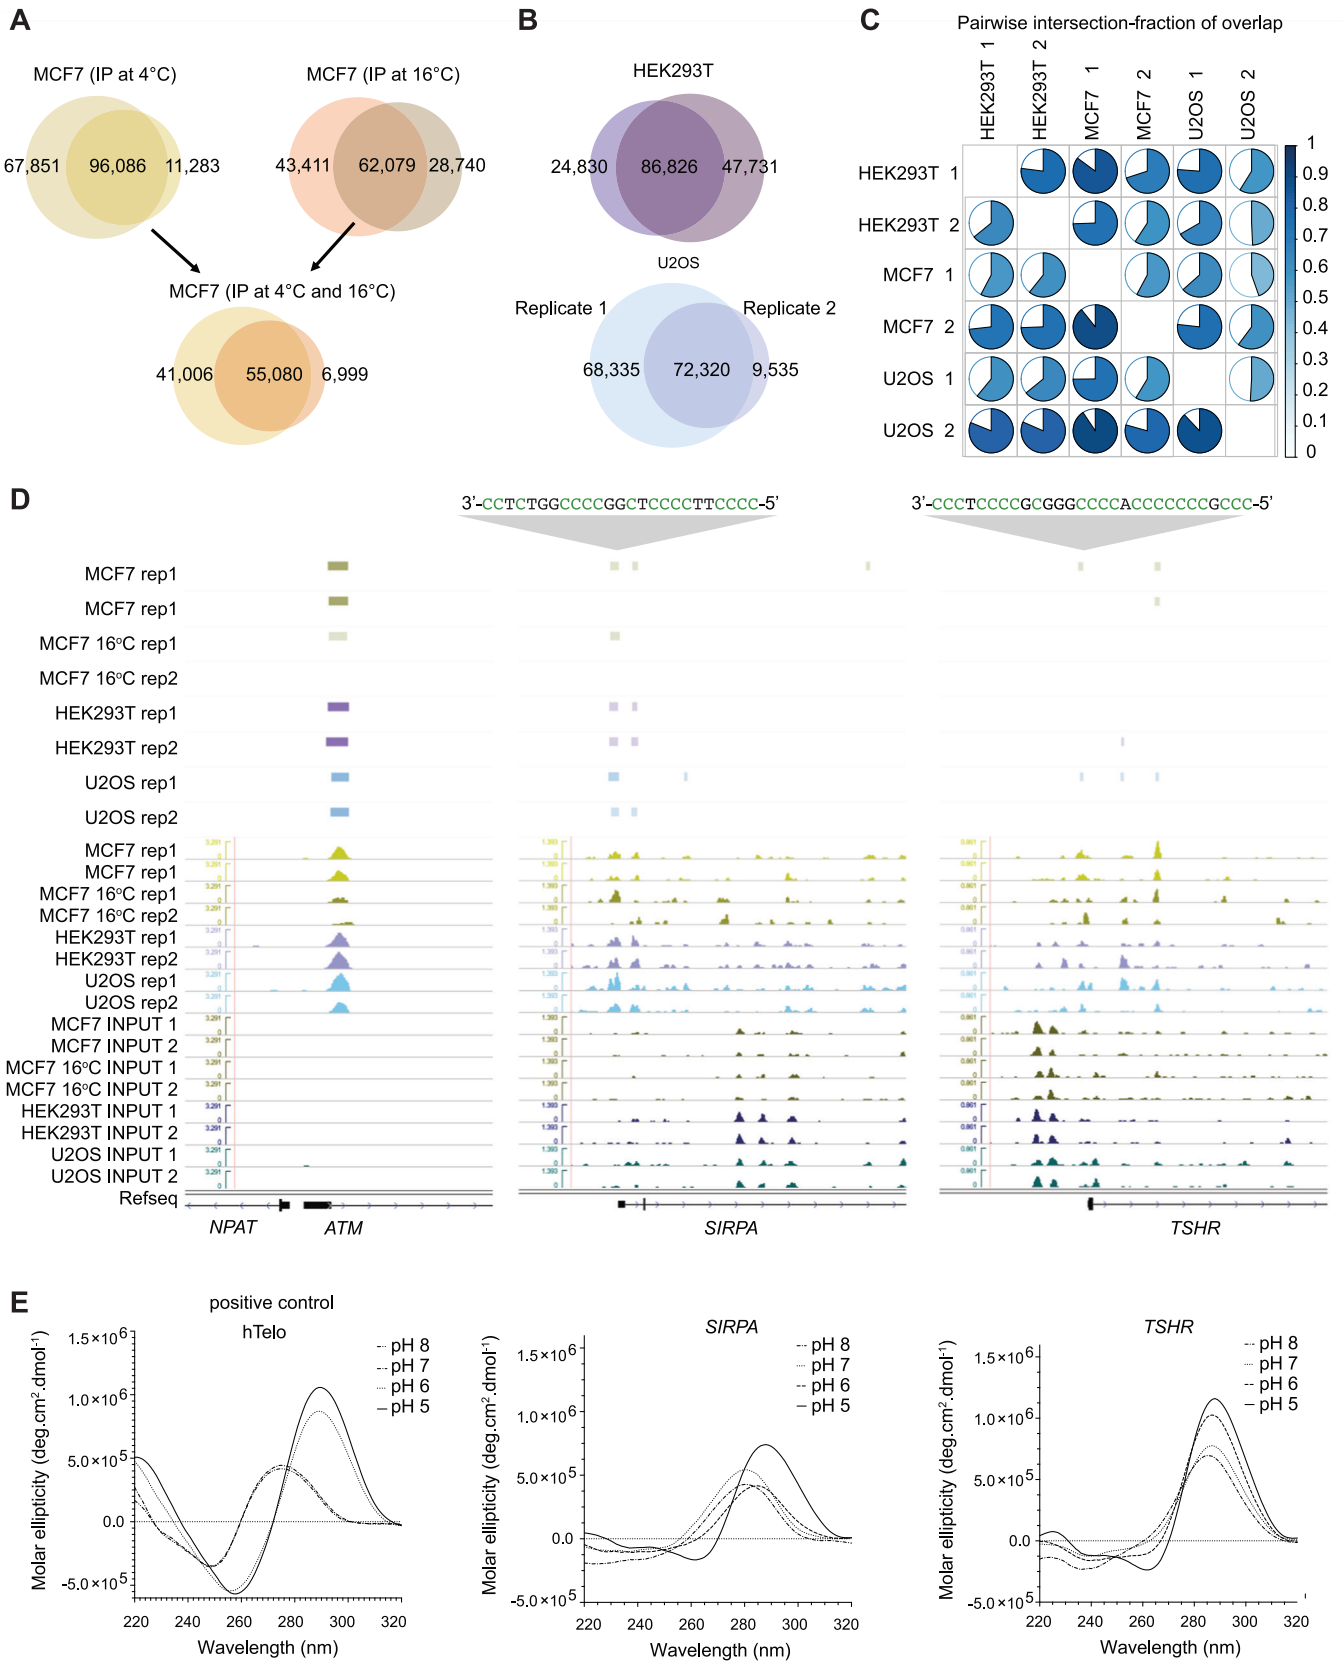

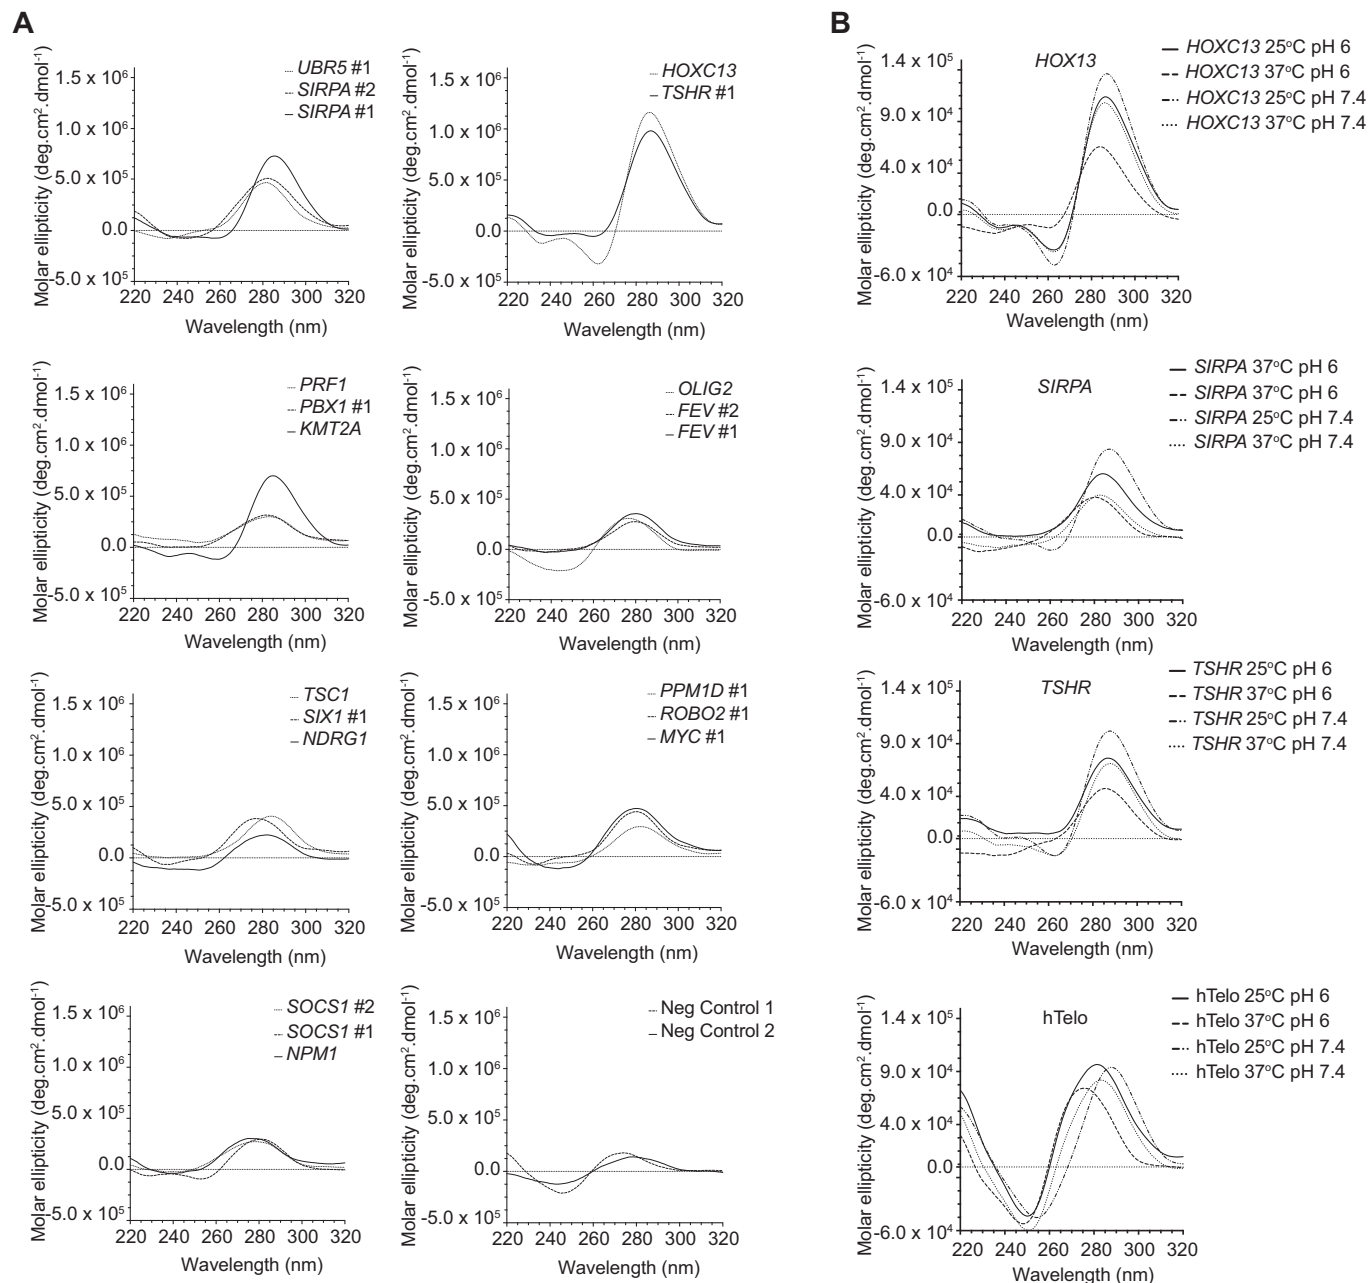

**Figure EV2. Biophysical validation of iM folding.**

(A) Validation of identified iMs by DNA synthesis and circular dichroism spectroscopy at pH 6.0 and a temperature of 25 °C of selected sequences proximal of promoter regions in known oncogenes. NC1(5'-CAGACTGTCGATGAAGCCCTG-3') and NC2 (5'-CTAGTTATTGCTCAGCGGTG-3') negative control sequences. (B) Effects of Temperature (25 °C or 37 °C) and pH (pH 6 or pH 7.4) on CD spectroscopy using identified iM regions associated to the genes *HOXC13*, *SIRPA*, *TSHR*, and the positive control hTelo sequence.

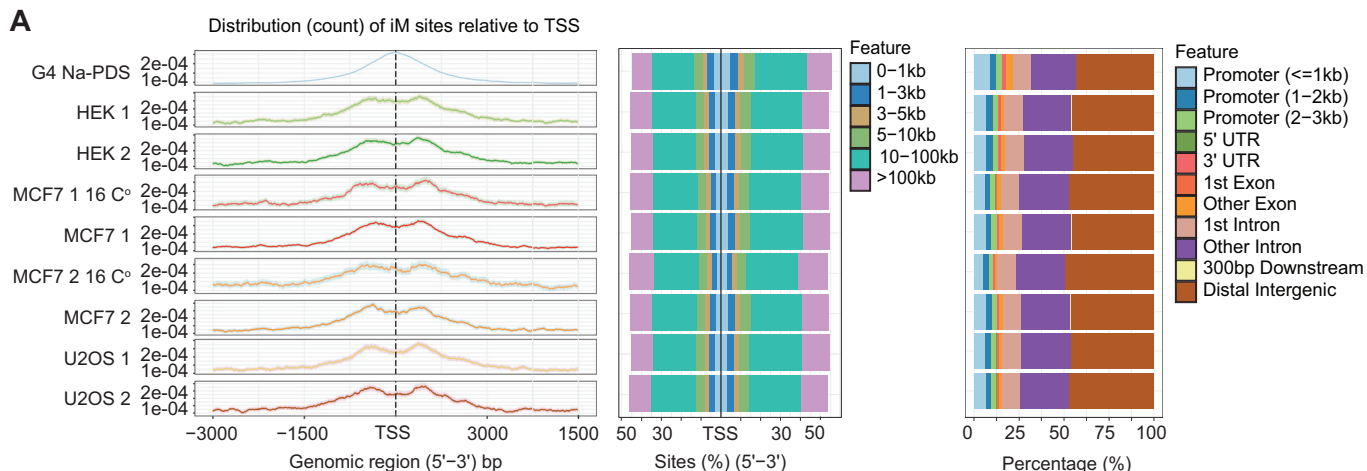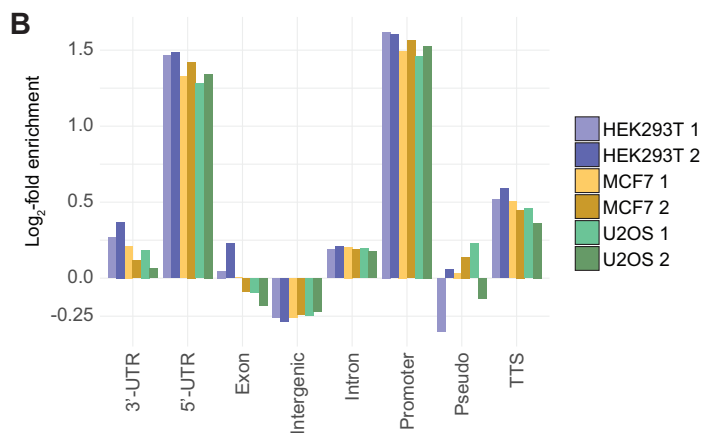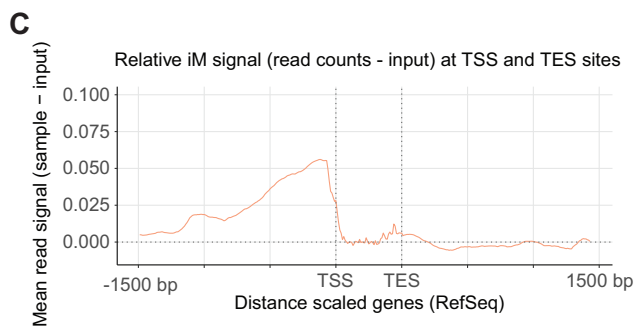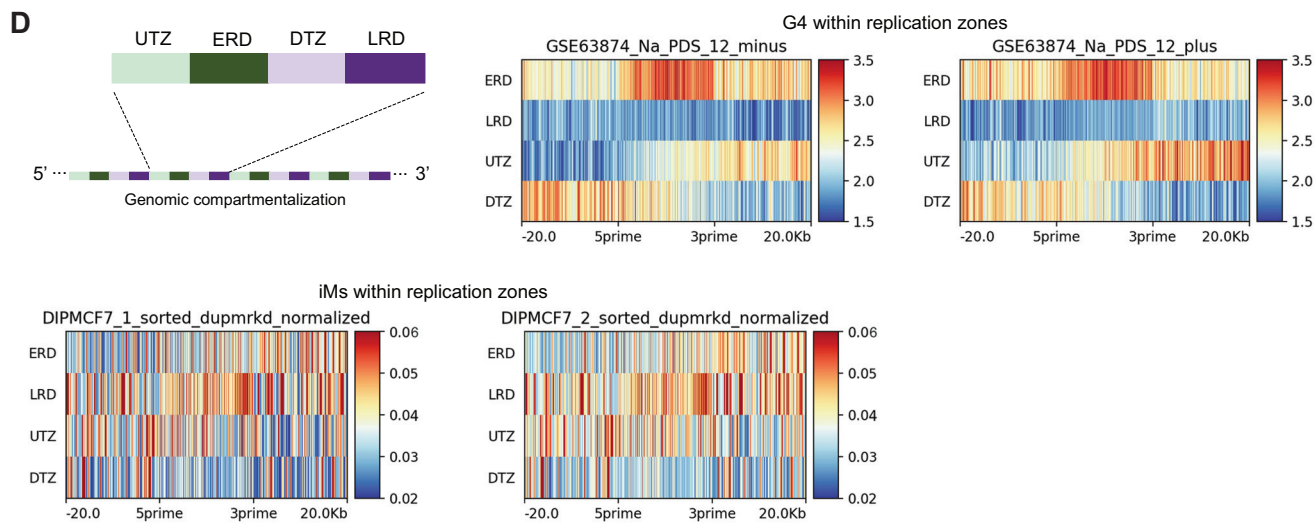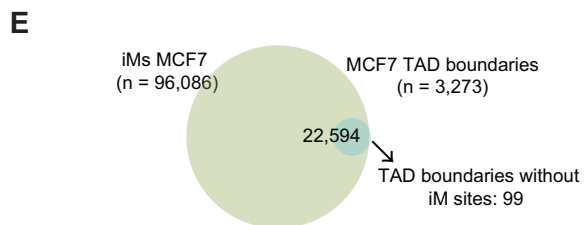

**◀ Figure EV3. Distribution and sequences of iM regions in common genomic features, DNA replication zones and TAD boundaries.**

(A) Distribution of genomic DNA iM structures across the human genome features. Left panels show the distribution of iM pulldown relative to all TSS regions (Refseq). Centre panels show the percentage of occupancy of iM sites relative to TSS distance. Right panels represent the percentage in relationship with the common gene body features. (B)  $\log_2$  fold enrichment of iM regions distributed across most common genomic annotations. (C) Relative immunoprecipitated DNA mean signal normalised (sample-input) in relationship to RefSeq gene coordinates. (D) Genomic partition of replication zones (analyses based on repetition of up transition zones (UTZ), early replication zones (ERD), down transition zones (DTZ) and late replication domains (LRD); Tag count heatmaps of G4 (Chambers et al, 2015) (upper panels) and iMs (lower panels; two biological replicates shown). (E) Overlap of iM regions found in DNA purified from MCF7 replicates and previously reported MCF7 TAD boundaries (GSE66733).

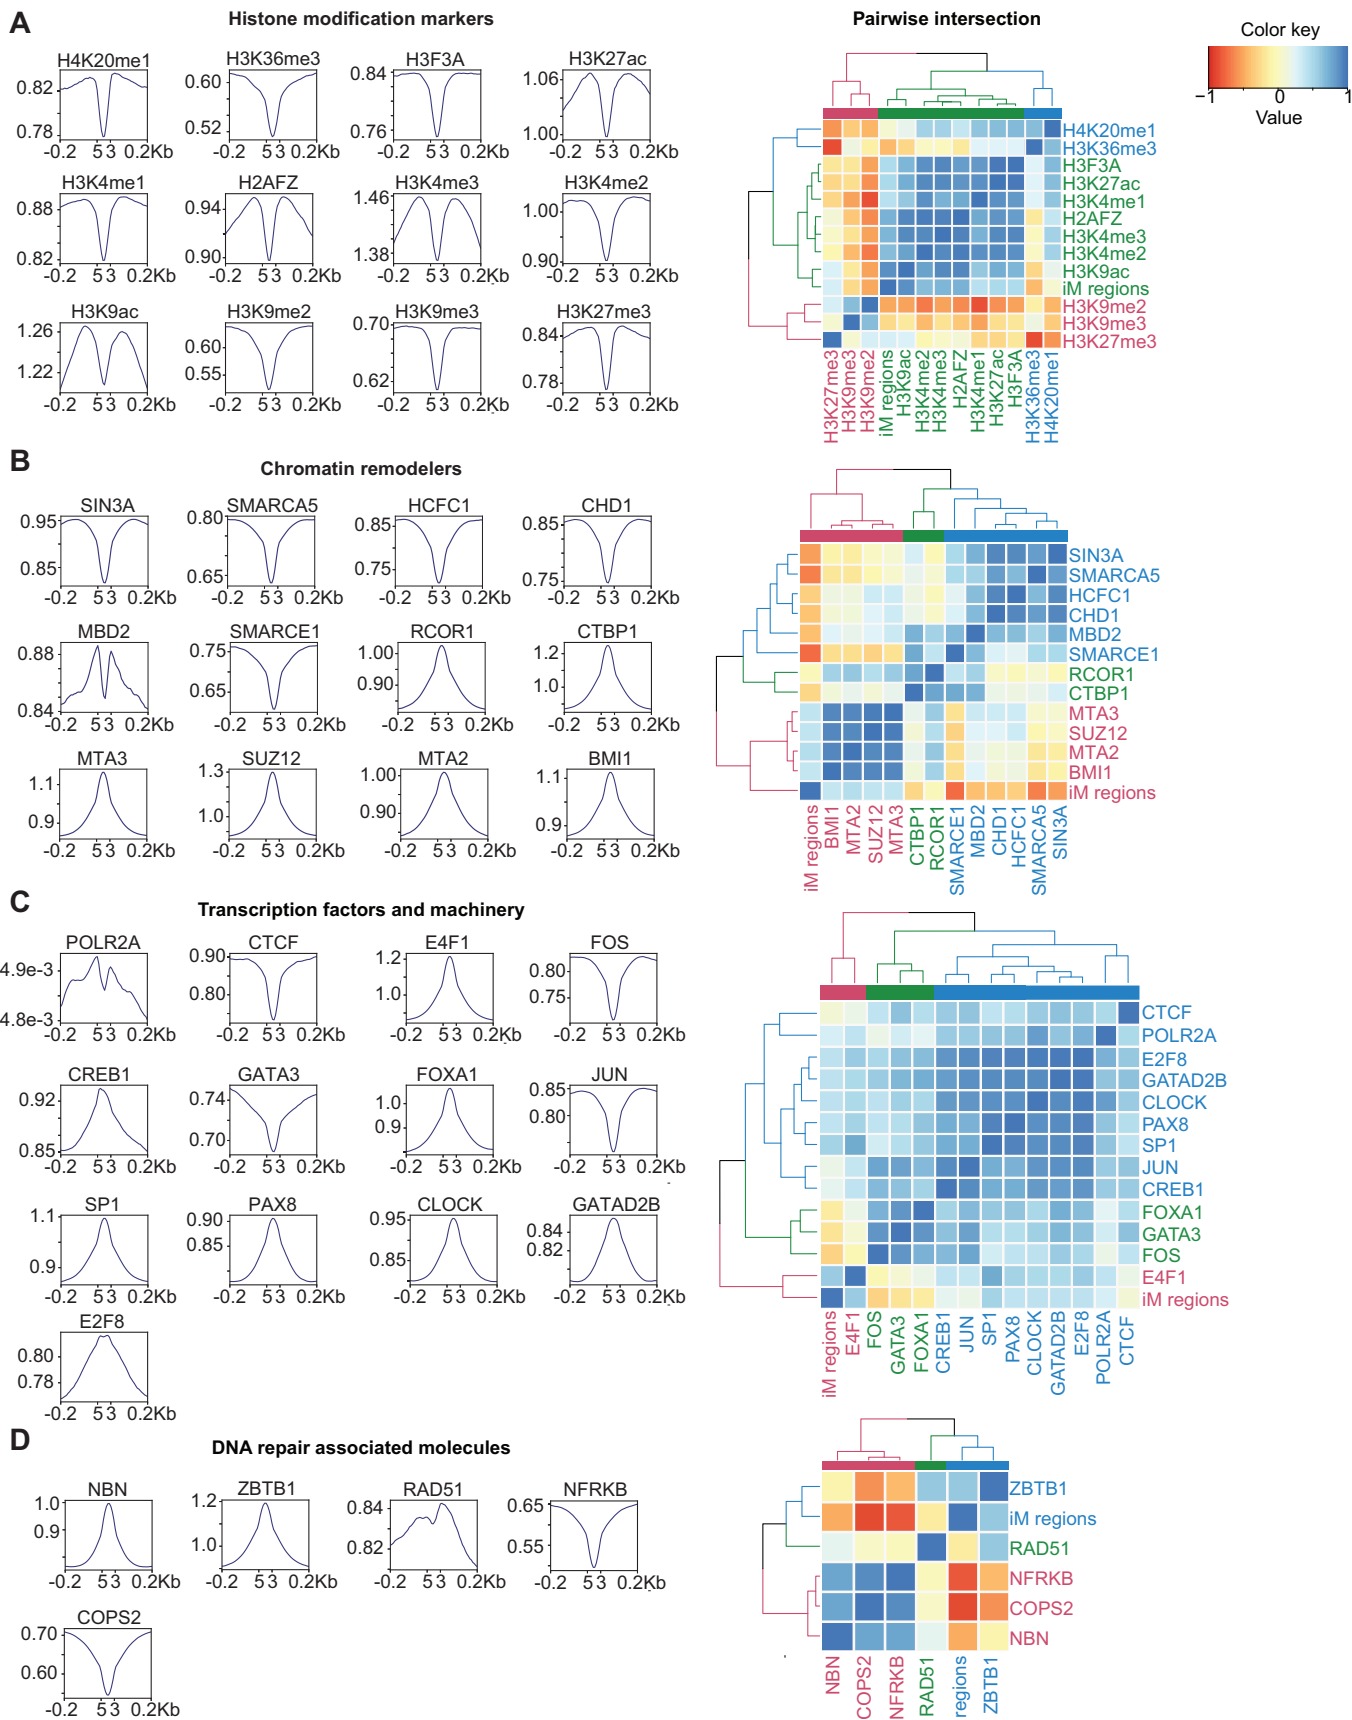

**◀ Figure EV4. iM regions occupy transcription machinery and active transcription histone modification sites.**

Read count occupancy of iMab pulldowns relative to reported ChIP-sequencing from transcription factors and histone modifications in MCF7 cells (ENCODE) and pairwise intersection of iM regions in MCF7 cells (spearman correlation values shown). (A) Histone modification markers. (B) Chromatin remodelers. (C) Transcription factors and transcription-related machinery. (D) DNA repair-associated molecules.

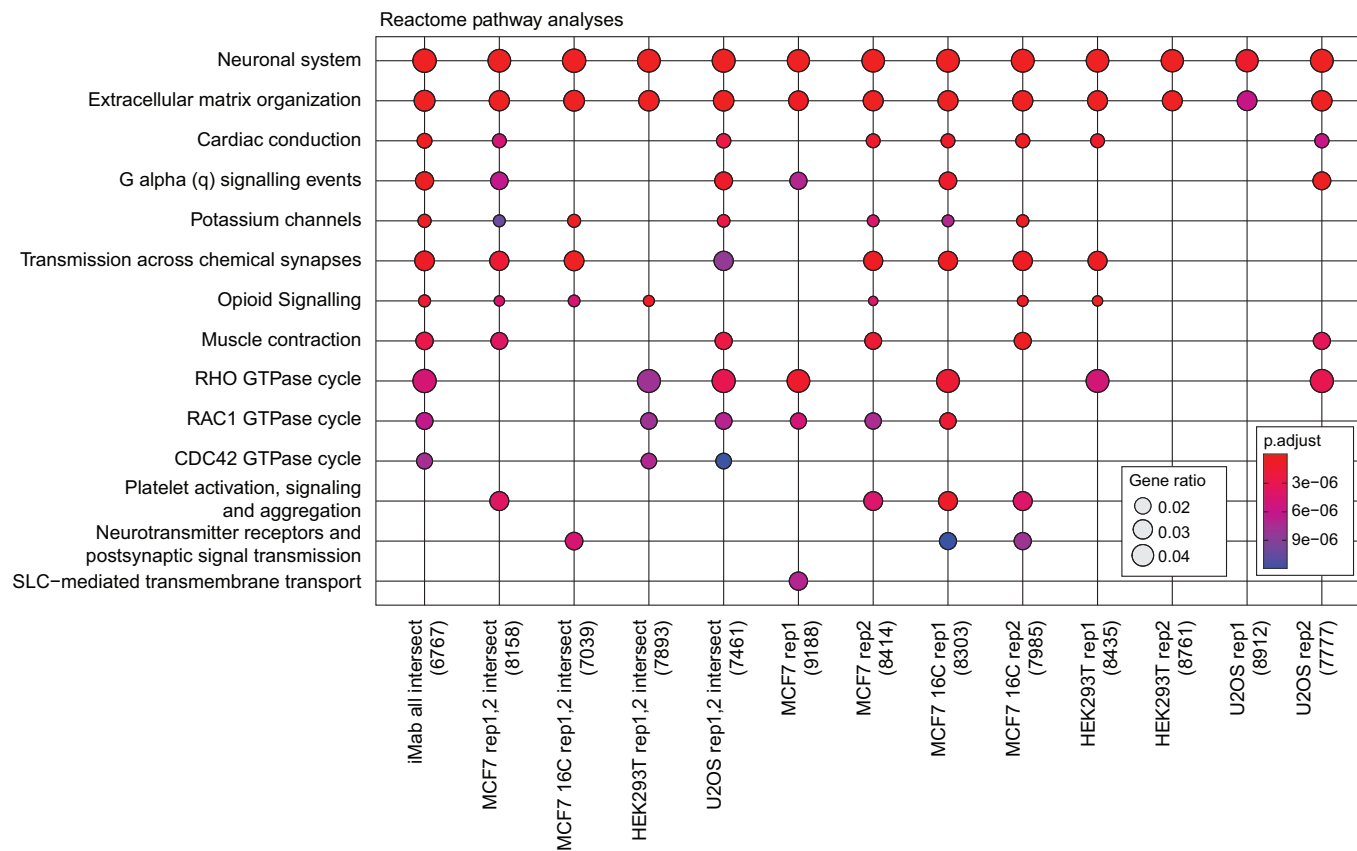

**Figure EV5. Pathway enrichment across sample sets.**

Reactome pathway enrichment analysis across samples from the different cell-lines and conditions. Ten most significant pathways shown with *P* value adjusted and scaled to highlight ratio of genes.
